# Supplementary material for: Disposable Non-Enzymatic Glucose Sensors Using Screen-Printed Nickel/Carbon Composites on Indium Tin Oxide Electrodes
Source: MDPI journal article supplement (doi:10.3390/s151229846), 2015-12-10
Supplement: s1 [file s1]

# Supplementary Materials: Disposable Non-Enzymatic Glucose Sensors Using Screen-Printed Nickel/Carbon Composites on Indium Tin Oxide Electrodes

Won-Yong Jeon, Young-Bong Choi and Hyug-Han Kim

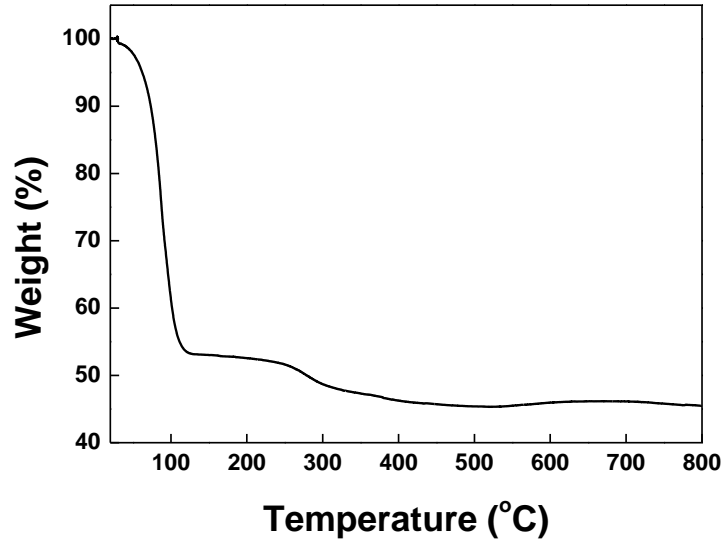

Figure S1: Thermo-gravimetric analysis (TGA) graph of the nickel/carbon composites at a 10 °C/min ramp rate.

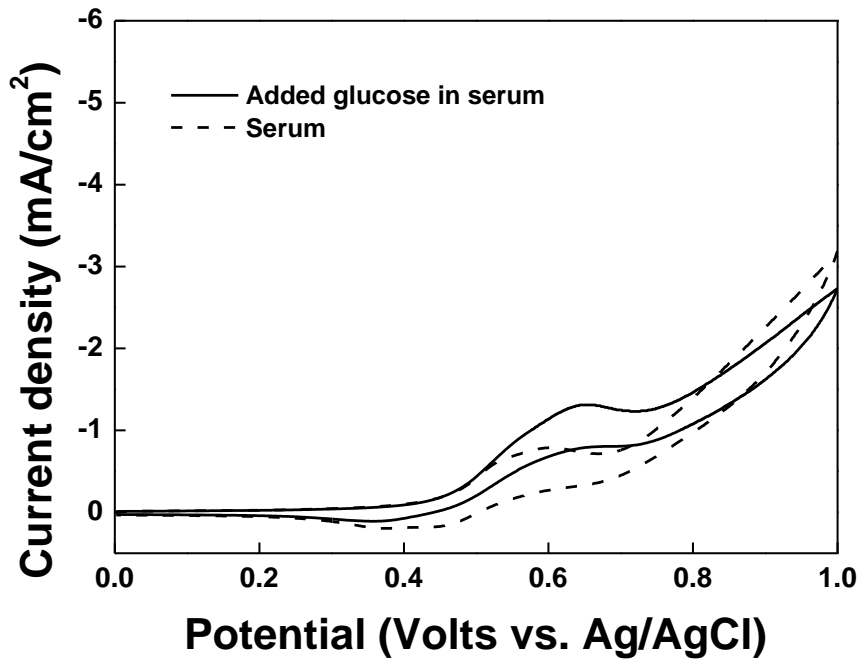

Figure S2: Cyclic voltammograms of added glucose in serum (line) and serum (dot) sample.
